# Supplementary material for: Molecular and kinetic design for the expanded control of molecular weights in the ring-opening metathesis polymerization of norbornene-substituted polyhedral oligomeric silsesquioxanes
Source: Royal Society of Chemistry journal article supplement (doi:10.1039/c8py00870a), 2018-01-01
Supplement: c8py00870a1.pdf [file c8py00870a1.pdf]

## Electronic Supplementary Information

Molecular and kinetic design for the expanded control of molecular weights in ring-opening metathesis polymerization of norbornene-substituted polyhedral oligomeric silsesquioxanes

*Chang-Geun Chae, Yong-Guen Yu, Ho-Bin Seo, Myung-Jin Kim, Mallela Y. L. N. Kishore and*

*Jae-Suk Lee\**

School of Materials Science and Engineering and ‡Grubbs Center for Polymers and Catalysis, Gwangju Institute of Science and Technology (GIST), 123 Cheomdangwagi-ro, Buk-gu, Gwangju 61005, Republic of Korea.

E-mail: jslee@gist.ac.kr; Tel.: (+82)-62-715-2306.

## S1. Experimental section

### S1.1. Materials

Aminopropyl-heptaisobutyl POSS ( $\text{NH}_2\text{C}_3\text{H}_6\text{POSS}$ ) and aminoethylaminopropylisobutyl-heptaisobutyl POSS ( $\text{NH}_2\text{C}_2\text{H}_4\text{NHC}_3\text{H}_6\text{POSS}$ ) were purchased from Hybrid Plastics. All other chemical compounds were purchased from commercial suppliers and used without further purification unless otherwise noted. Tetrahydrofuran (THF) was distilled over sodium naphthalenide and degassed at  $10^{-6}$  Torr. Hexane was distilled over 1,1-diphenylhexyllithium and degassed at  $10^{-6}$  Torr. Lithium chloride (LiCl) was dried with stirring at  $150^\circ\text{C}$  for 24 h at  $10^{-6}$  Torr. A 1.4 M *sec*-butyllithium (*s*-BuLi) solution in cyclohexane was degassed, appropriately diluted in hexane, divided into clean glass ampules equipped with break-seals at  $10^{-6}$  Torr, and stored at  $-30^\circ\text{C}$ . 1,1-Diphenylethylene (DPE) and benzyl methacrylate (BzMA) were distilled over calcium hydride ( $\text{CaH}_2$ ) at reduced pressure and then redistilled over  $\text{CaH}_2$  at  $10^{-6}$  Torr. DPE, LiCl, and BzMA were appropriately diluted in THF, divided into clean glass ampules equipped with break-seals at  $10^{-6}$  Torr, and stored at  $-30^\circ\text{C}$ . 5-Norbornene-*exo*-2,3-dicarboxylic anhydride (*exo*-NBAnh), 12-(5-norbornene-*exo*-2,3-dicarboximido)dodecanoic acid (*exo*-NBC<sub>11</sub>H<sub>22</sub>COOH) and  $\text{RuCl}_2(\text{pyridine})_2(\text{H}_2\text{IMes})(\text{CHPh})$  (**Ru**) were prepared in our previous work.<sup>S1</sup>

### S1.2. Instruments and analyses

A glove box (Seed Tac Korea Co.) retained a nitrogen atmosphere with 0.1–0.3 ppm of  $\text{H}_2\text{O}$  and 1.0–1.5 ppm of  $\text{O}_2$  to carry out the ring-opening metathesis polymerization (ROMP). Proton and carbon-13 nuclear magnetic resonance ( $^1\text{H}$  and  $^{13}\text{C}$  NMR) spectra of synthesized compounds were recorded using a JNM-ECX 400 NMR spectrometer (JEOL, 400 MHz) in chloroform-*d*

(CDCl<sub>3</sub>, 99.8% atom D, contains 0.03 vol% tetramethylsilane) at 25 °C. Fourier-transform infrared (FT-IR) spectroscopy for potassium bromide (KBr) pellets containing monomers was conducted using a Nicolet iS10 (Thermo Scientific). Elemental analysis (EA) for monomers was conducted using US/Vario Max CN (Elementar; combustion temperature: 1800 °C) and Flash 2000 (Thermo Scientific; combustion temperature: 1000 °C). Conversion (conv), number-average molecular weight ( $M_n$ ), weight-average molecular weight ( $M_w$ ), dispersity ( $D = M_w/M_n$ ), and z-average radius of gyration ( $R_{g,z}$ ) of synthesized polymers were determined using a size exclusion chromatography-multiangle laser light scattering (SEC-MALLS) instrument equipped with a 515 HPLC pump (Waters), a set of four Styragel columns connected in series (HR 0.5, HR 1, HR 3, and HR 4 with pore sizes of 50, 100, 500, and 1000 Å, respectively, Waters), a miniDAWN TREOS light scattering detector (Wyatt Technology), and an Optilab T-rEX refractive index detector (Wyatt Technology). The SEC-MALLS instrument was operated in THF/triethylamine (98/2 v/v) with an elution rate of 1.0 mL/min at 40 °C. Refractive index increment ( $dn/dc$ ) values of polymers were calculated assuming 100% mass recovery of the injected polymer samples. Thermogravimetric analysis (TGA) measurement was performed on a TGA Q50 (TA Instruments) at a heating rate of 10 °C/min under a nitrogen atmosphere. Differential scanning calorimetry (DSC) measurement was performed on a DSC Q20 (TA Instruments) at cooling and heating rates of 2 °C/min under a nitrogen atmosphere. Wide-angle X-ray scattering (WAXS) profiles were recorded using a Rigaku D/max-2500 diffractometer with Cu-K $\alpha$  radiation ( $\lambda = 1.54$  Å) at 40 kV and 100 mA. Transmission electron microscopy (TEM) measurement was performed on a Tecnai G2 S-Twin (FEI) at an accelerating voltage of 300 kV. Processing of numerical data was performed on an OriginPro 2017 (OriginLab).

### S1.3. Synthesis procedures for POSS-substituted monomers

#### S1.3.1. 3-(5-Norbornene-*exo*-2,3-dicarboximido)propyl-heptaisobutyl POSS (M1)

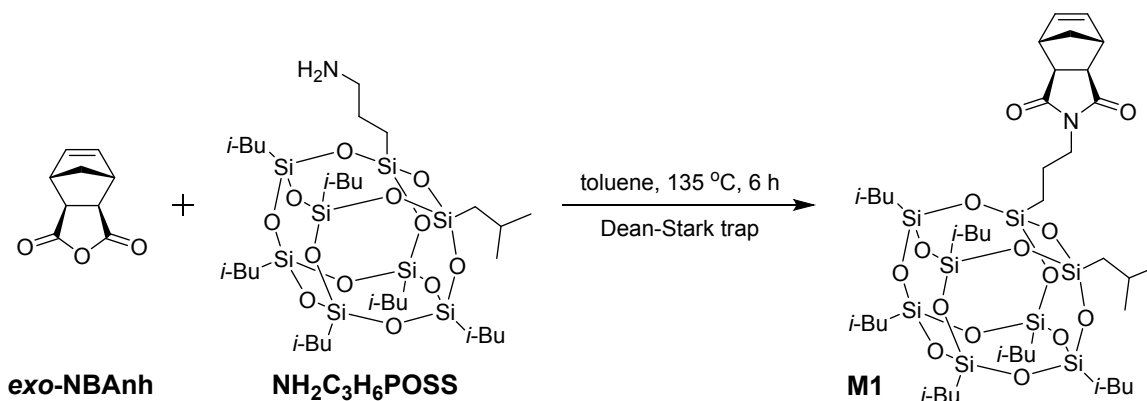

A two-neck 100 mL flask equipped with a Dean-Stark trap was charged with nitrogen for 30 min. To the flask were added toluene (25 mL), *exo*-NBA nh (0.939 g, 5.72 mmol) and  $\text{NH}_2\text{C}_3\text{H}_6\text{POSS}$  (5.00 g, 5.72 mmol). The reaction mixture was stirred at 135 °C for 16 h. After the reaction was complete, the solution was cooled and concentrated at reduced pressure. The residual mixture was dissolved in DCM (25 mL) and then washed with 0.1 N HCl (10 mL) and brine (10 mL) in sequence. The organic layer was dried over  $\text{Na}_2\text{SO}_4$ , filtered, and concentrated at reduced pressure. The recovered solid was precipitated in cool methanol, filtered, and dried under vacuum to afford **M1** as a white powder (5.55 g, 95%).

**M1**:  $^1\text{H}$  NMR ( $\text{CDCl}_3$  with 0.03% v/v TMS, 400 MHz):  $\delta$  (ppm) 6.28 (s, 2H), 3.44 (t, 2H,  $J = 7.6$  Hz), 3.26 (s, 2H), 2.66 (s, 2H), 1.83 (m, 7H), 1.63 (m, 2H), 1.50 (d, 1H,  $J = 8.0$  Hz), 1.22 (d, 1H,  $J = 9.6$  Hz), 0.94 (dd, 42H,  $J = 6.4, 1.6$  Hz), 0.59 (dd, 16H,  $J = 6.8, 2.0$  Hz).  $^{13}\text{C}$  NMR ( $\text{CDCl}_3$  with 0.03% v/v TMS, 100 MHz):  $\delta$  (ppm) 177.94, 137.89, 47.85, 45.25, 42.76, 41.24, 25.72, 23.92, 22.53, 21.47, 9.86.

**S1.3.2. 3-(2-(5-Norbornene-exo-2,3-dicarboximido)ethylamino)propyl-heptaisobutyl POSS (M2)**

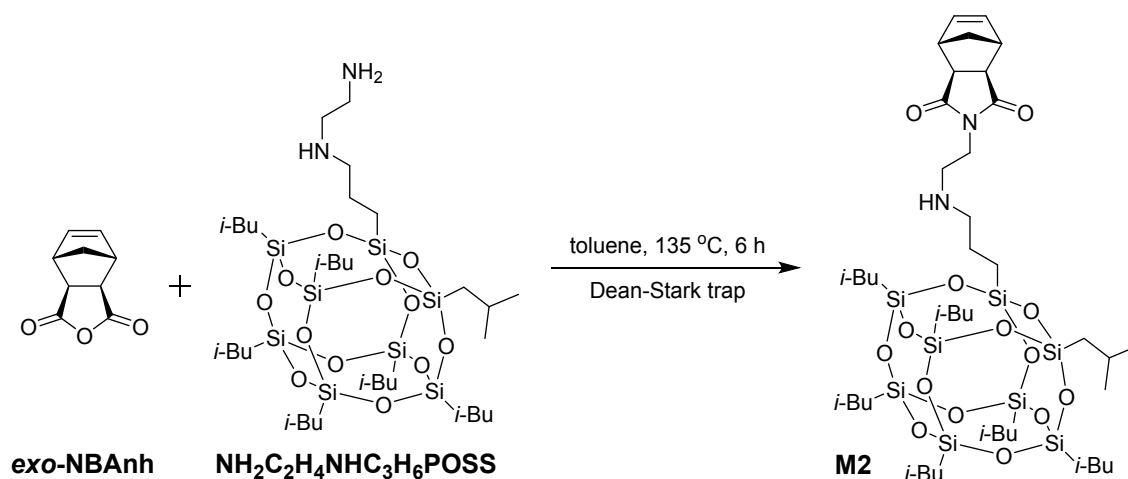

A two-neck 100 mL flask equipped with a Dean-Stark trap was charged with nitrogen for 30 min. To the flask were added toluene (25 mL), *exo*-NBA nh (0.895 g, 5.45 mmol) and  $\text{NH}_2\text{C}_2\text{H}_4\text{NHC}_3\text{H}_6\text{POSS}$  (5.00 g, 5.45 mmol). The reaction mixture was stirred at 135 °C for 6 h. After the reaction was complete, the solution was cooled and concentrated at reduced pressure. The crude product was purified by silica gel column chromatography in hexane/ethyl acetate (initially 8/2 v/v and subsequently 6/4 v/v). The recovered solid was precipitated in cool methanol, filtered, and dried under vacuum to afford **M2** as a white powder (3.16 g, 54%).

**M2**:  $^1\text{H}$  NMR ( $\text{CDCl}_3$  with 0.03% v/v TMS, 400 MHz):  $\delta$  6.27 (s, 2H), 3.58 (t, 2H,  $J = 6.2$  Hz), 3.25 (s, 2H), 2.78 (t, 2H,  $J = 6.4$  Hz), 2.66 (s, 2H), 2.55 (t, 2H,  $J = 7.2$  Hz), 1.83 (m, 7H), 1.48 (quint, 2H,  $J = 8$  Hz), 1.46 (s, 2H), 0.94 (dd, 42H,  $J = 6.8, 1.2$  Hz), 0.58 (d, 16H,  $J = 6.8$  Hz).  $^{13}\text{C}$  NMR ( $\text{CDCl}_3$  with 0.03% v/v TMS, 100 MHz):  $\delta$  (ppm) 178.28, 137.92, 52.02, 47.91, 46.84, 45.36, 42.85, 38.54, 25.75, 23.93, 22.58, 9.63.

**S1.3.3. 3-(12-(5-Norbornene-*exo*-2,3-dicarboximido)dodecanoylamino)propyl-heptaisobutyl POSS (M3)**

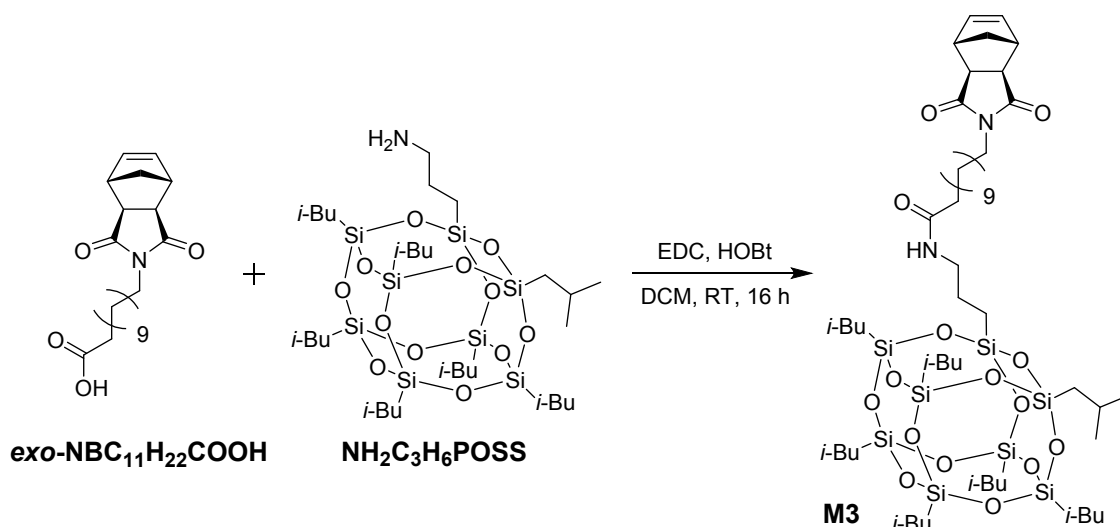

The synthesis procedure for **M3** is described in our previous report.<sup>S1</sup>

**M3**: <sup>1</sup>H NMR (CDCl<sub>3</sub> with 0.03% v/v TMS, 400 MHz):  $\delta$  (ppm) 6.28 (s, 2H), 5.42 (s, 1H), 3.44 (t, 2H,  $J = 7.6$  Hz), 3.26 (s, 2H), 3.29–3.17 (m, 4H), 2.66 (s, 2H), 2.13 (t, 2H,  $J = 7.6$  Hz), 1.84 (m, 7H), 1.66–1.44 (m, 8H), 1.24 (m, 14H), 0.95 (d, 42H,  $J = 6.4$  Hz), 0.59 (dd, 16H,  $J = 6.8, 1.2$  Hz). <sup>13</sup>C NMR (CDCl<sub>3</sub> with 0.03% v/v TMS, 100 MHz):  $\delta$  (ppm) 178.08, 172.95, 137.88, 47.86, 45.22, 42.76, 41.73, 38.79, 36.99, 29.65–29.25, 29.14, 27.80, 26.98, 25.89, 25.73, 23.91, 23.14, 22.55, 9.53. Typical NMR spectra of **M3** are offered in our previous report.<sup>S1</sup>

#### S1.3.4. *exo*-5-Norbornene-2-carbonyl-end poly(benzyl methacrylate) (NBPBzMA)

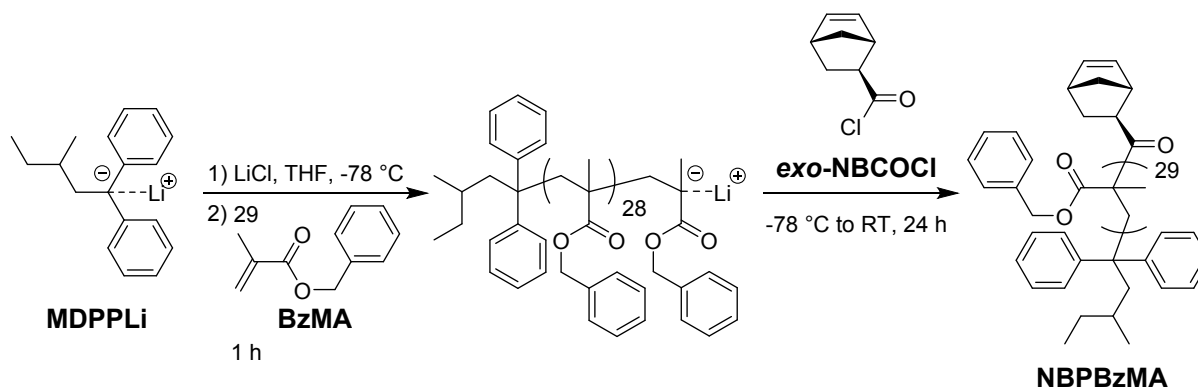

The synthesis procedure for **NBPBzMA** is described in our previous report.<sup>S1</sup>

**NBPBzMA:**  $M_n = 5.44$  kDa ( $M_{n,theo} = 4.95$  kDa at  $[BzMA]_0/[s-BuLi]_0 = 26.0$ ).  $D = 1.02$ .  $^1H$  NMR ( $CDCl_3$  with 0.03% v/v TMS, 400 MHz):  $\delta$  (ppm) 7.41–7.01 (br), 6.09–5.66 (br), 5.17–4.50 (br), 2.10–0.40 (br).  $^{13}C$  NMR ( $CDCl_3$  with 0.03% v/v TMS, 100 MHz):  $\delta$  (ppm) 177.14, 135.24, 128.62, 66.86, 54.25, 44.87, 18.57. Typical NMR spectra of **NBPBzMA** are offered in our previous report.<sup>S1</sup>

### S1.4. Polymerization procedures

#### S1.4.1. Homopolymerization of M1–3 via ROMP

All ROMP experiments were carried out in a glove box charged with nitrogen. The volumes of THF for monomer and initiator were set according to  $[M]_0 = 0.1$  or  $0.4$  M. One of the monomers (**M1–3**) (100 mg) was dissolved in THF in a 10 mL vial, and then the solution was stirred. A 0.01 M solution of **Ru** in THF was rapidly added via syringe to allow polymerization. The volume of added **Ru** was set according to  $[M]_0/[I]_0$ . At regular time intervals, aliquots (50  $\mu$ L) were extracted and transferred into solutions of ethyl vinyl ether (3 droplets) in THF (1 mL) to terminate the reaction. The aliquots were used for SEC analysis to characterize the conversion,

$M_n$ ,  $M_w$ , and  $D$  depending on the reaction time. After final conversion, the resulting polymer was isolated by precipitation in acetonitrile, filtration, and drying under vacuum.

**P1**:  $dn/dc = 0.0658$  mL/g.  $^1\text{H}$  NMR ( $\text{CDCl}_3$  with 0.03% v/v TMS, 400 MHz):  $\delta$  (ppm) 5.87–5.24 (br), 3.76–2.46 (br), 1.84 (m), 1.62 (s), 1.50 (s), 0.94 (d,  $J = 6.4$  Hz), 0.59 (d,  $J = 6.8$  Hz).  $^{13}\text{C}$  NMR ( $\text{CDCl}_3$  with 0.03% v/v TMS, 100 MHz):  $\delta$  (ppm) 178.07, 131.89, 41.45, 25.76, 23.91, 22.54, 21.41, 9.72.

**P2**:  $dn/dc = 0.0760$  mL/g.  $^1\text{H}$  NMR ( $\text{CDCl}_3$  with 0.03% v/v TMS, 400 MHz):  $\delta$  (ppm) 5.86–5.30 (br), 3.76–2.44 (br), 1.84 (m), 1.58 (s), 1.51 (s), 0.94 (d,  $J = 6.4$  Hz), 0.58 (d,  $J = 7.2$  Hz).  $^{13}\text{C}$  NMR ( $\text{CDCl}_3$  with 0.03% v/v TMS, 100 MHz):  $\delta$  (ppm) 178.37, 132.31, 52.24, 46.89, 38.69, 25.75, 23.91, 23.24, 22.61, 9.72.

**P3**:  $dn/dc = 0.0670$  mL/g.  $^1\text{H}$  NMR ( $\text{CDCl}_3$  with 0.03% v/v TMS, 400 MHz):  $\delta$  (ppm) 5.89–5.23 (br), 3.80–2.50 (br), 2.13 (t,  $J = 7.4$  Hz), 1.84 (m), 1.68–1.44 (br), 1.25 (s), 0.95 (d,  $J = 6.4$  Hz), 0.59 (d,  $J = 6.8$  Hz).  $^{13}\text{C}$  NMR ( $\text{CDCl}_3$  with 0.03% v/v TMS, 100 MHz):  $\delta$  (ppm) 178.32, 173.00, 131.96, 41.78, 38.73, 37.01, 29.86–29.14, 27.82, 27.08, 25.96, 25.75, 23.93, 23.15, 22.56, 9.56. Typical NMR spectra of **P3** are offered in our previous report.<sup>1</sup>

#### S1.4.2. Block copolymerization of **M3** and **NBPBzMA** via sequential ROMP

Three different amounts of **M3** (200 mg/150 mg/100 mg, corresponding to 0.164 mmol/0.120 mmol/0.0821 mmol) were dissolved in THF (0.21 mL/0.16 mL/0.10 mL) in 10 mL vials, and then the solutions were stirred. Three volumes of 0.01 M **Ru** in THF (0.330  $\mu\text{mol}$ /0.250  $\mu\text{mol}$ /0.160  $\mu\text{mol}$  of **Ru**) were rapidly added via syringe to the three monomer solutions in sequence to allow homopolymerization. After the complete conversion of **M3**, three volumes of 0.1 M **NBPBzMA** in THF (100 mg/150 mg/200 mg, corresponding to 0.0184 mmol/0.0276

mmol/0.0368 mmol of **NBPBzMA**) were subsequently added via syringe to the three reaction mixtures in sequence to allow block copolymerization. When precipitation occurred, THF was added to the reaction mixtures to re-dissolve the precipitates. After stirring for 24 h, the polymerization was quenched by adding 2 droplets of ethyl vinyl ether. The resulting polymers were isolated by precipitation in methanol, filtration, and drying under vacuum. A small amount of residual **NBPBzMA** macromonomers in BCP with  $f_{\text{wt,P3}}$  of 34% (entry 33 in Table 3) was eliminated by fractional precipitation in acetonitrile/methanol (1/1 v/v).

**P3-*b*-P(NB-*g*-BzMA)**:  $dn/dc = 0.0847$  mL/g for  $f_A = 67$  wt% (entry 31 in Table 3), 0.105 mL/g for  $f_A = 50$  wt% (entry 32 in Table 3) and 0.124 mL/g for  $f_A = 34$  wt% (entry 33 in Table 3).  $^1\text{H}$  NMR ( $\text{CDCl}_3$  with 0.03% v/v TMS, 400 MHz):  $\delta$  (ppm) 7.37–7.00 (br), 5.87–5.36 (br), 3.78–2.50 (br), 2.13 (t,  $J = 7.4$  Hz), 1.84 (m), 2.00–0.40 (br).  $^{13}\text{C}$  NMR ( $\text{CDCl}_3$  with 0.03% v/v TMS, 100 MHz):  $\delta$  (ppm) 177.16, 173.06, 135.34, 131.89, 128.47, 66.87, 54.21, 45.01, 41.80, 37.05, 29.61, 27.88, 27.07, 26.01, 25.80, 23.97, 23.17, 22.56, 18.52, 16.59, 9.57. Typical NMR spectra of **P3-*b*-P(NB-*g*-BzMA)**s with  $f_A = 67$ , 50 and 34 wt% are offered in our previous report.<sup>1</sup>

### S1.5. Preparation of self-assembled **P3-*b*-P(NB-*g*-BzMA)** thin films for TEM analysis

**P3-*b*-P(NB-*g*-BzMA)** solutions in THF (2.5 mg/mL for  $f_A = 67$  and 50 wt%; 5.0 mg/mL for  $f_A = 34$  wt%) were drop-cast on carbon-coated copper grids, and the samples were placed in a closed chamber containing THF (10 mL) for solvent-vapor annealing at 25 °C. The annealing times were 24 h for  $f_A = 67$  wt%, 12 h for  $f_A = 50$  wt% and 1 h for  $f_A = 34$  wt%. The self-assembled **P3-*b*-P(NB-*g*-BzMA)** thin films were dried at room temperature for 24 h, then directly used for TEM analysis without staining.

## S2. Characterization of synthetic compounds

$^1\text{H}$  NMR ( $\text{CDCl}_3$  with 0.03 vol% TMS, 400 MHz)

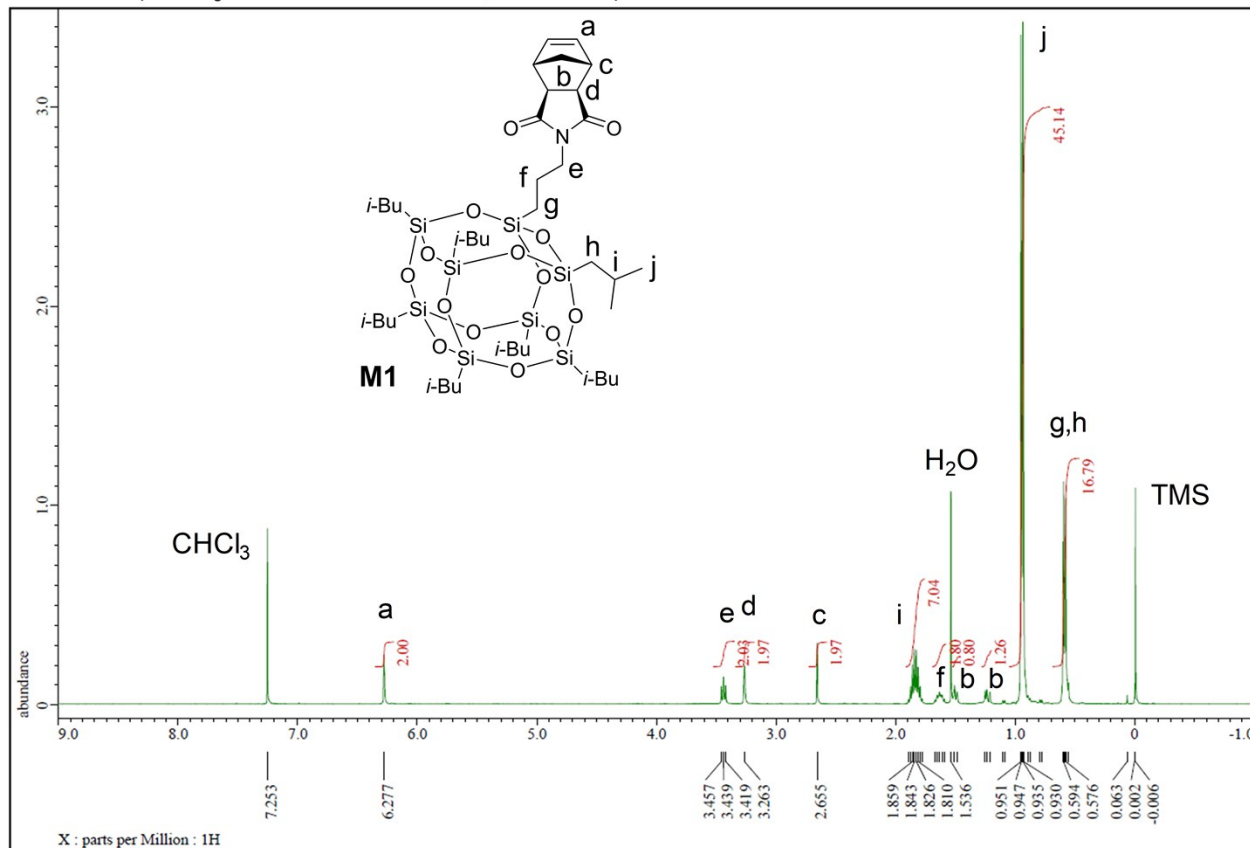

**Fig. S1**  $^1\text{H}$  NMR spectrum of **M1** in  $\text{CDCl}_3$ .

$^{13}\text{C}$  NMR ( $\text{CDCl}_3$  with 0.03 vol% TMS, 100 MHz)

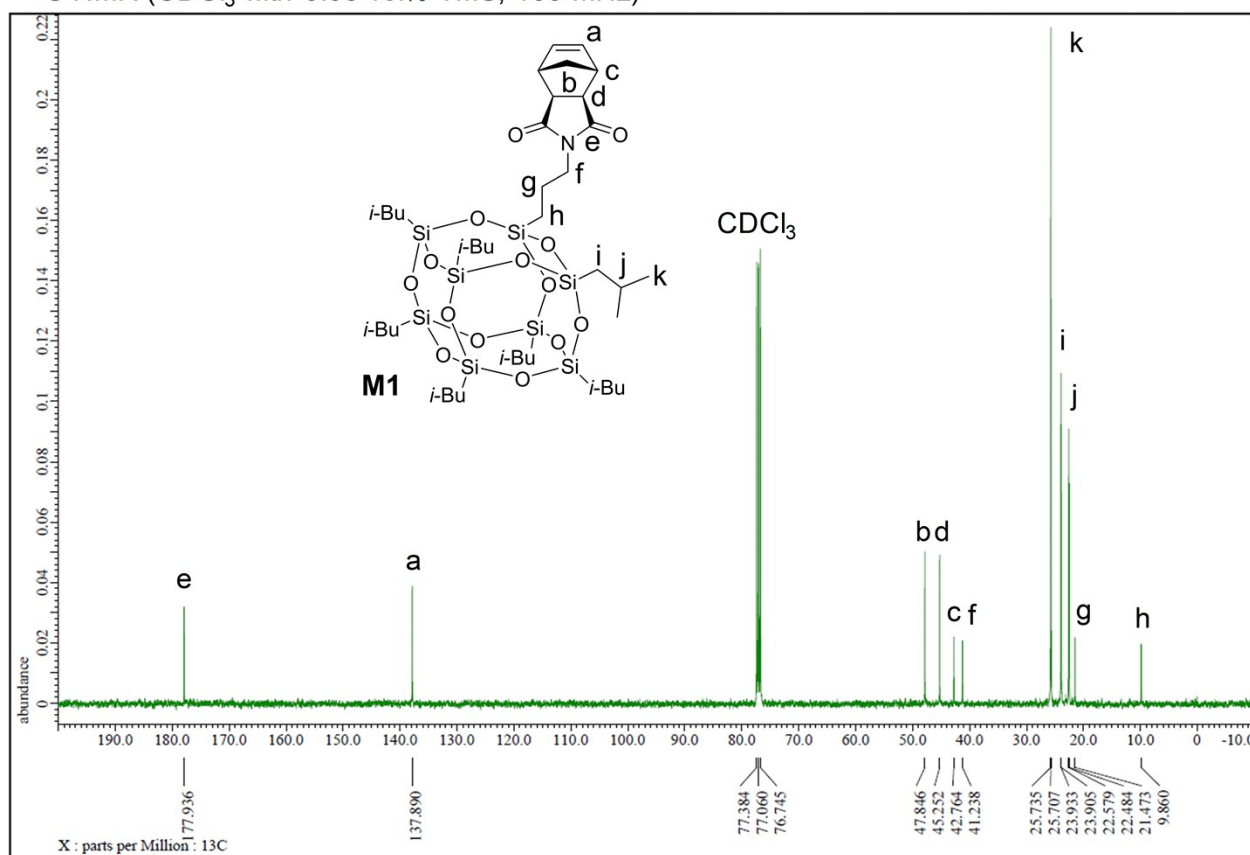

**Fig. S2**  $^{13}\text{C}$  NMR spectrum of **M1** in  $\text{CDCl}_3$ .

$^1\text{H}$  NMR ( $\text{CDCl}_3$  with 0.03 vol% TMS, 400 MHz)

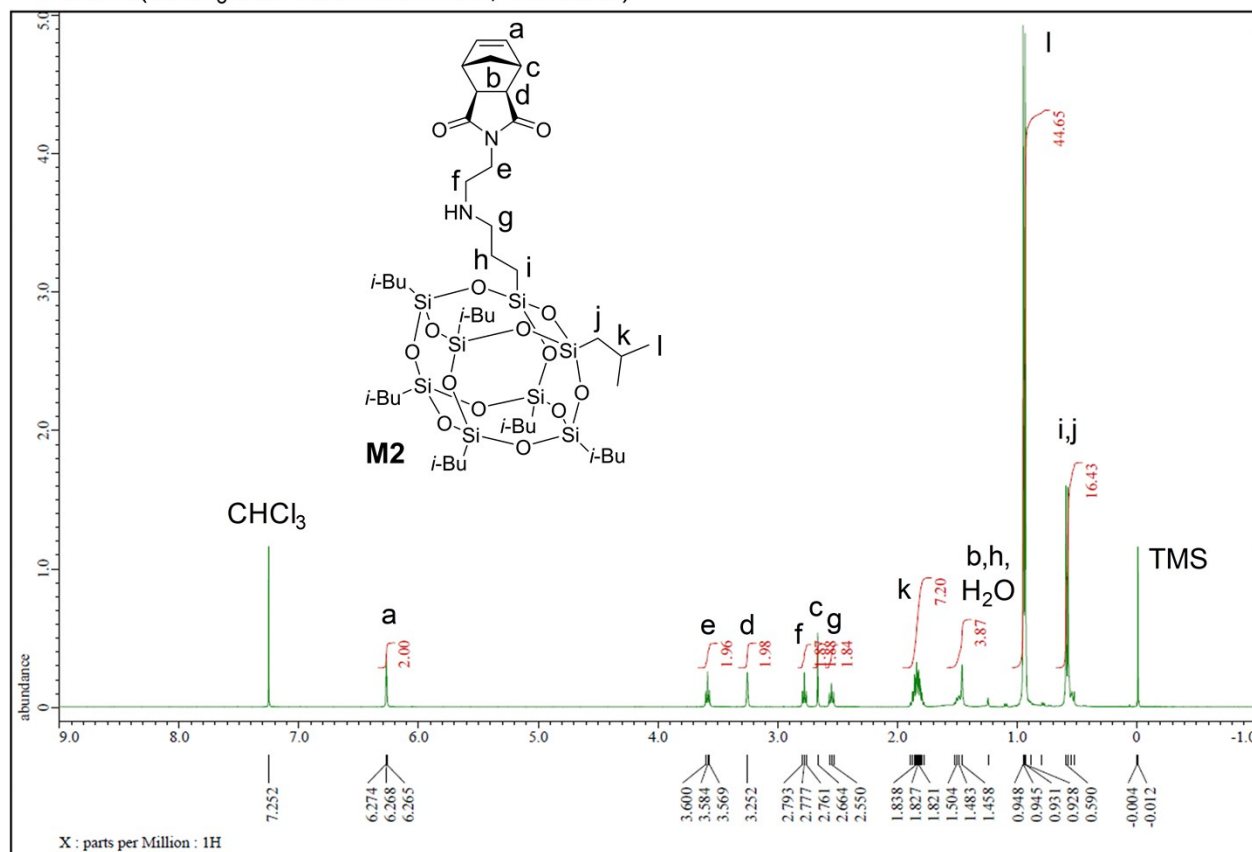

**Fig. S3**  $^1\text{H}$  NMR spectrum of **M2** in  $\text{CDCl}_3$ .

$^{13}\text{C}$  NMR ( $\text{CDCl}_3$  with 0.03 vol% TMS, 100 MHz)

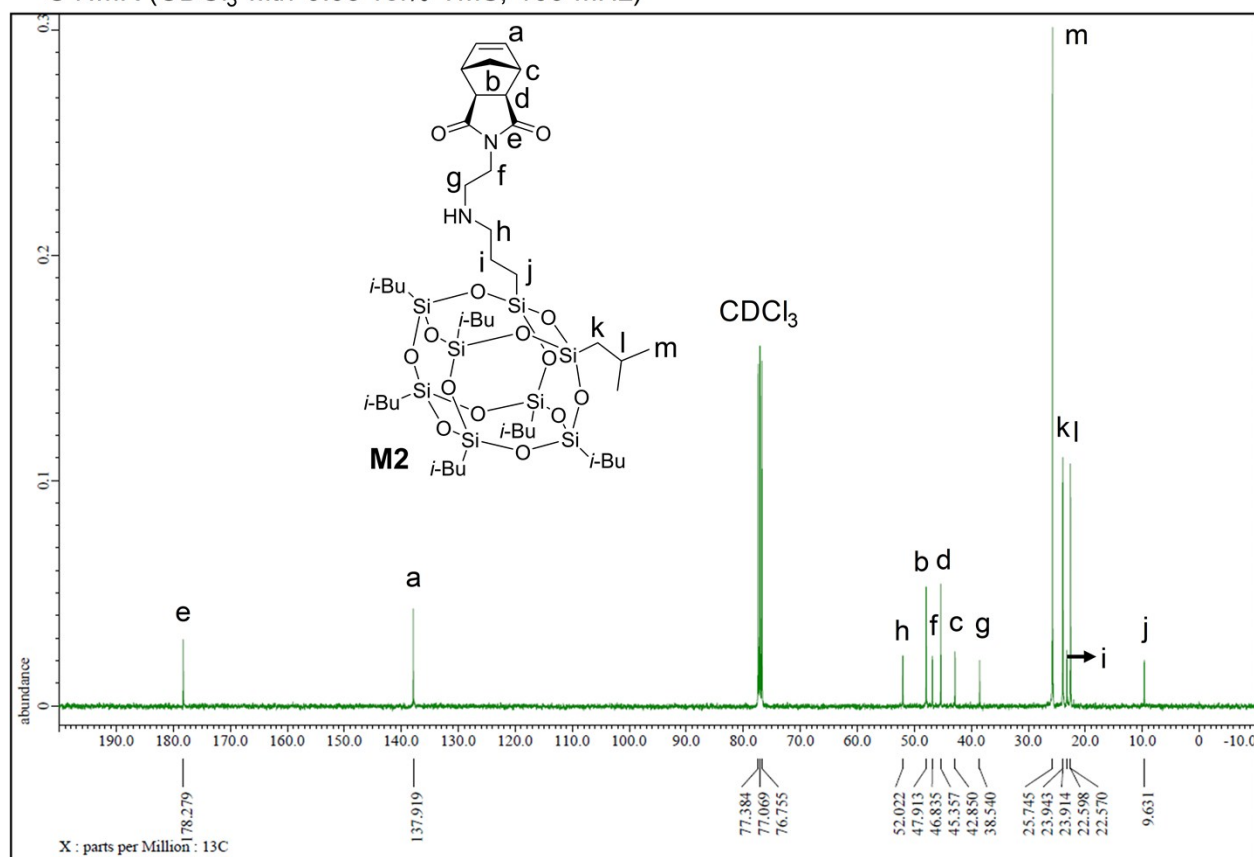

**Fig. S4**  $^{13}\text{C}$  NMR spectrum of **M2** in  $\text{CDCl}_3$ .

$^1\text{H}$  NMR ( $\text{CDCl}_3$  with 0.03 vol% TMS, 400 MHz)

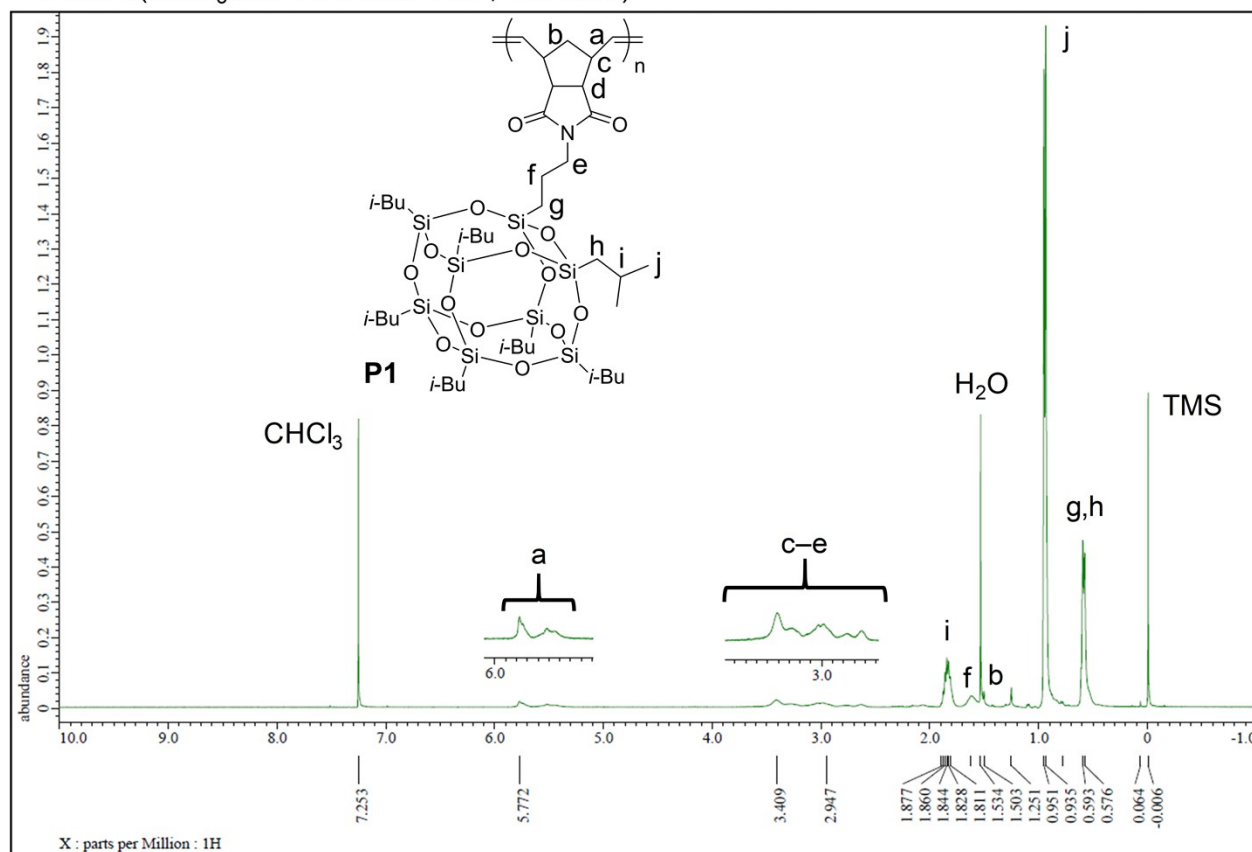

**Fig. S5**  $^1\text{H}$  NMR spectrum of **P1** in  $\text{CDCl}_3$ .

$^{13}\text{C}$  NMR ( $\text{CDCl}_3$  with 0.03 vol% TMS, 100 MHz)

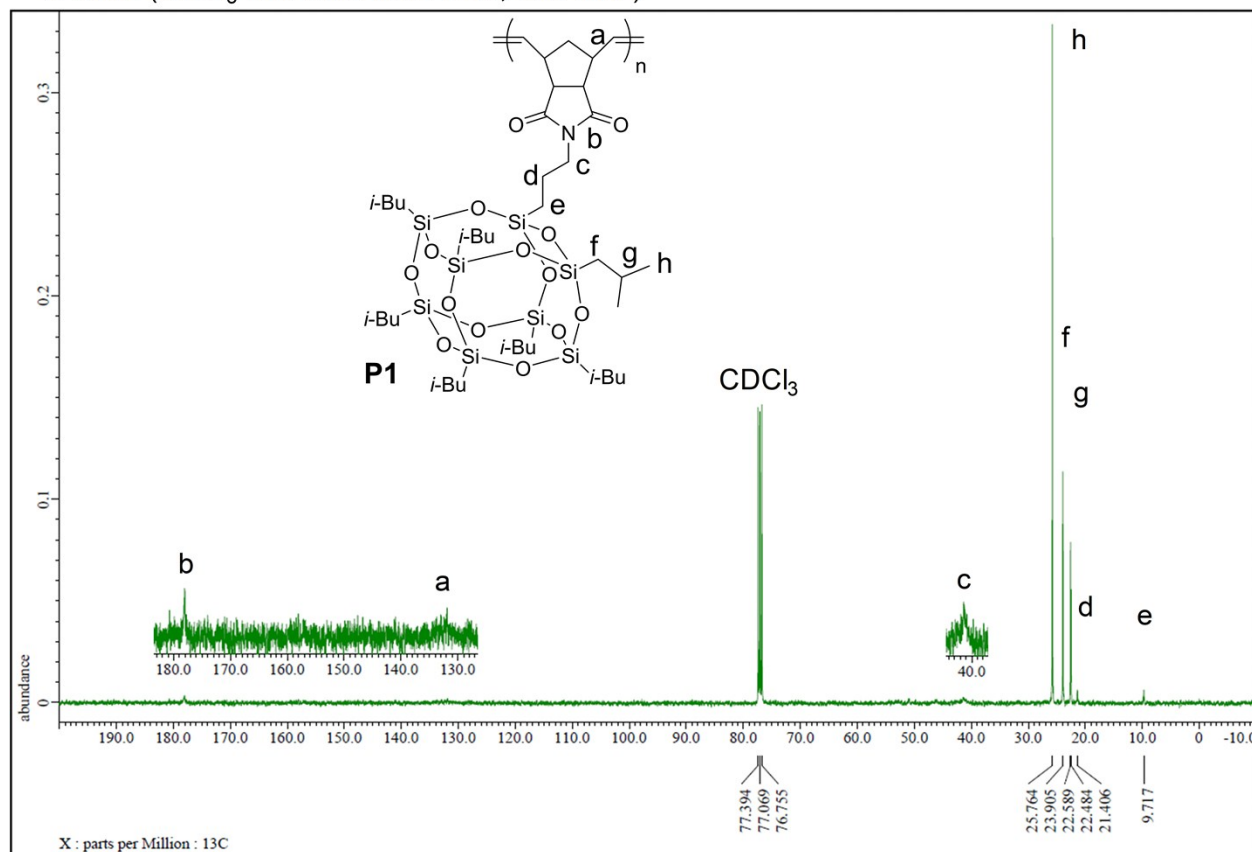

**Fig. S6**  $^{13}\text{C}$  NMR spectrum of **P1** in  $\text{CDCl}_3$ .

$^1\text{H}$  NMR ( $\text{CDCl}_3$  with 0.03 vol% TMS, 400 MHz)

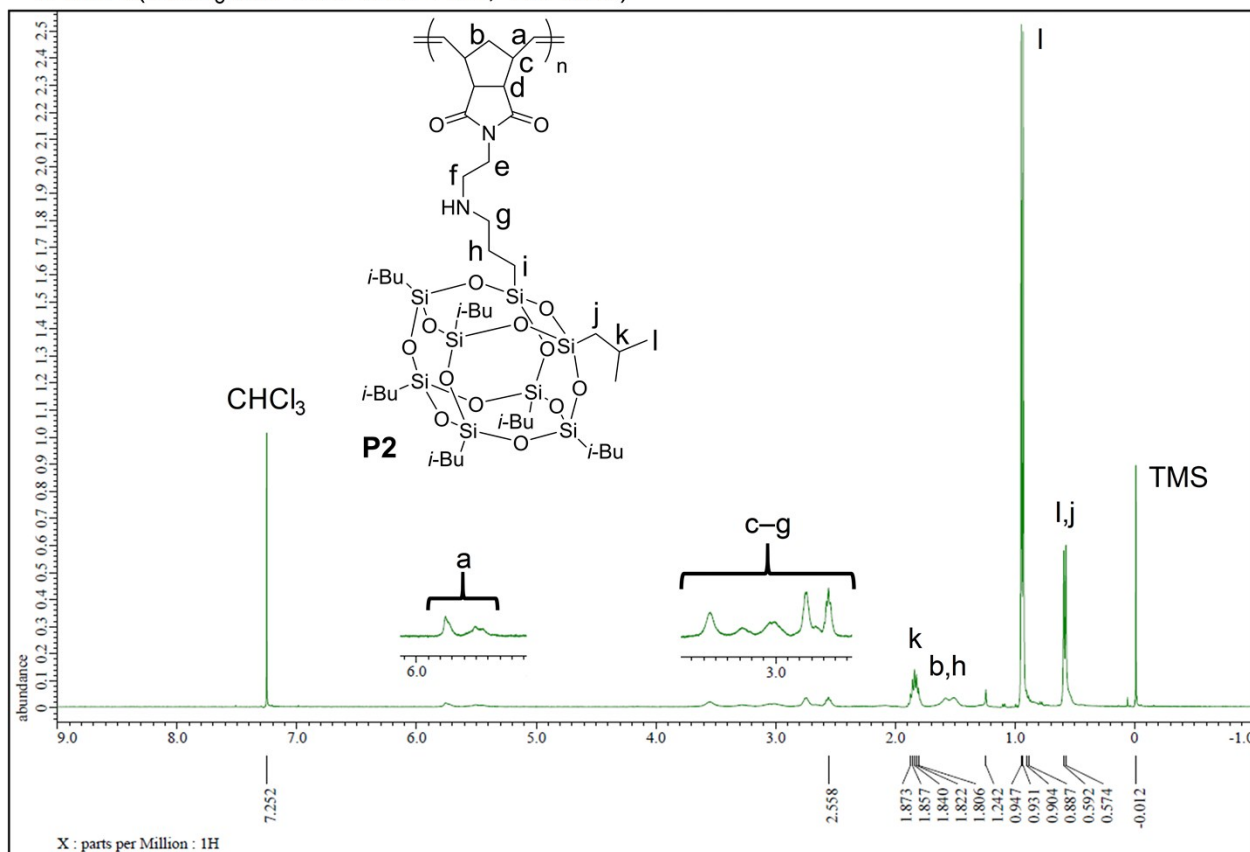

**Fig. S7**  $^1\text{H}$  NMR spectrum of **P2** in  $\text{CDCl}_3$ .

$^{13}\text{C}$  NMR ( $\text{CDCl}_3$  with 0.03 vol% TMS, 100 MHz)

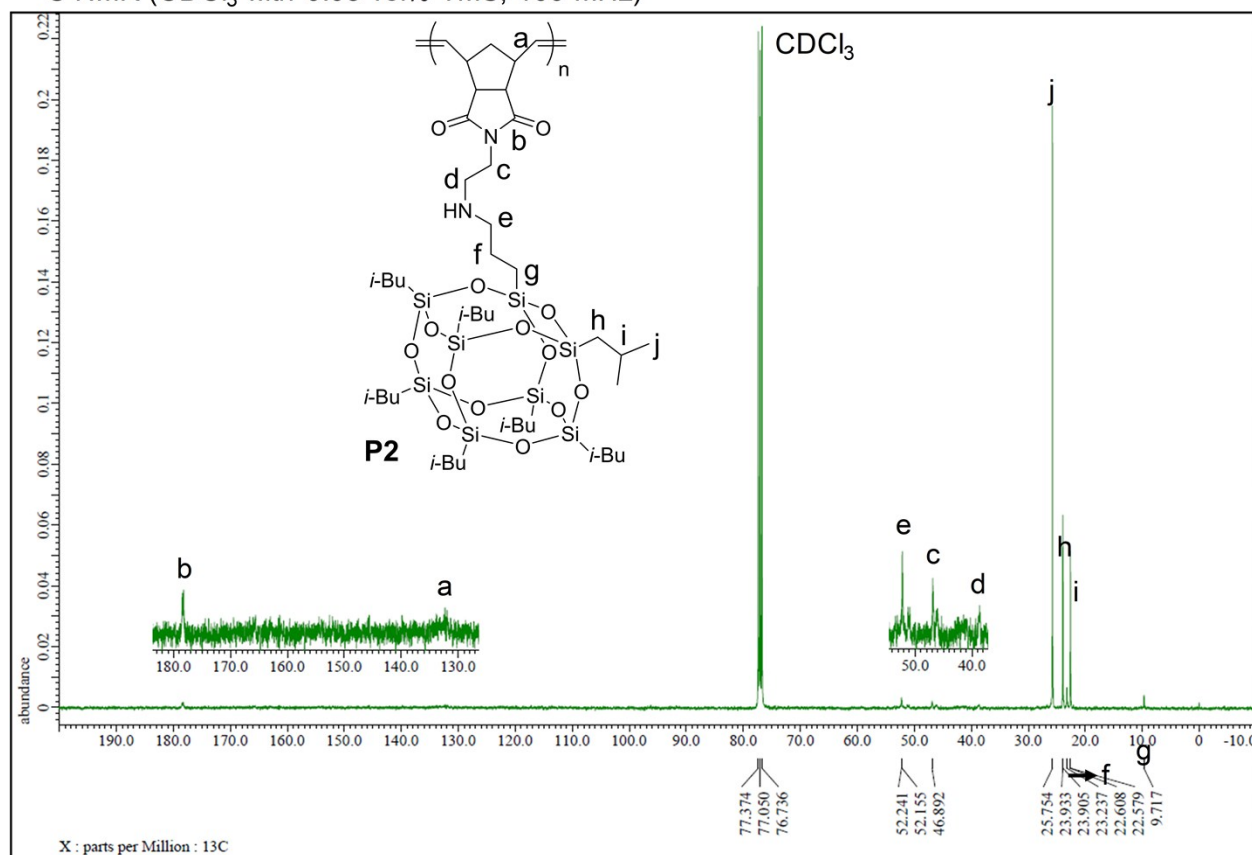

**Fig. S8**  $^{13}\text{C}$  NMR spectrum of **P2** in  $\text{CDCl}_3$ .

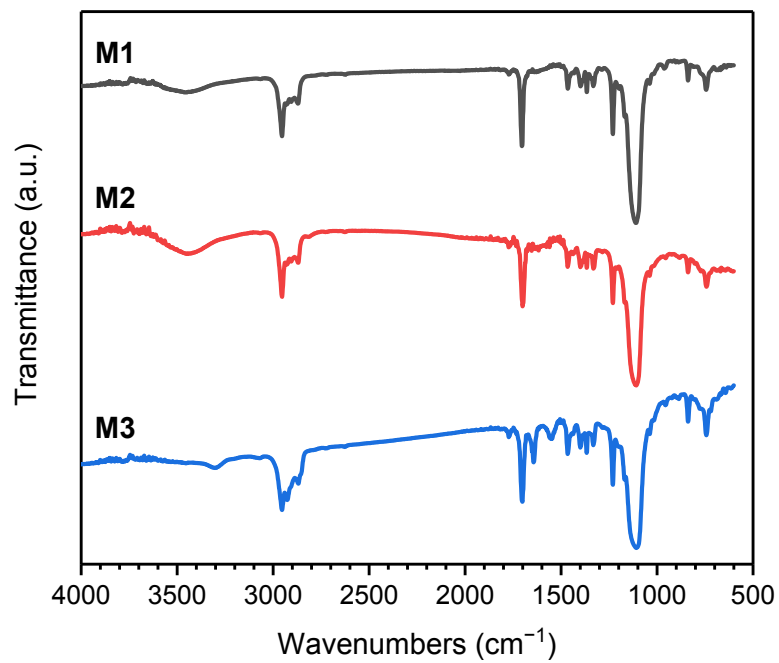

**Fig. S9** FT-IR spectra of **M1–3**.

**Table S1** Results of EA for **M1–3**

| M         | Chemical formula                                                                | Observed (calculated) proportion of element except for Si <sub>8</sub> O <sub>12</sub> (wt%) |           |           |           |
|-----------|---------------------------------------------------------------------------------|----------------------------------------------------------------------------------------------|-----------|-----------|-----------|
|           |                                                                                 | C                                                                                            | H         | N         | O         |
| <b>M1</b> | C <sub>40</sub> H <sub>77</sub> NO <sub>14</sub> Si <sub>8</sub>                | 47.2 (47.1)                                                                                  | 7.8 (7.6) | 1.5 (1.4) | 3.3 (3.1) |
| <b>M2</b> | C <sub>42</sub> H <sub>82</sub> N <sub>2</sub> O <sub>14</sub> Si <sub>8</sub>  | 47.2 (47.4)                                                                                  | 7.9 (7.8) | 2.6 (2.6) | 3.0 (3.0) |
| <b>M3</b> | C <sub>52</sub> H <sub>100</sub> N <sub>2</sub> O <sub>15</sub> Si <sub>8</sub> | 50.9 (51.3)                                                                                  | 7.8 (8.3) | 2.5 (2.3) | 3.8 (3.9) |

<sup>a</sup>The elements of Si<sub>8</sub>O<sub>12</sub> nanocage were not detected in EA due to its conversion to silica at combustion temperatures.

### S3. Details of kinetic analysis for ROMP of **M1–3** ( $[\mathbf{M}]_0 = 0.1 \text{ M}$ )

**Table S2** ROMP of **M1** initiated by **Ru** (**I**) in THF at 25 °C ( $[\mathbf{M1}]_0 = 0.1 \text{ M}$ )

| Entry | $[\mathbf{M1}]_0/[\mathbf{I}]_0$ | $t^a$<br>(s) | Conv <sup>b</sup><br>(%) | $M_{n,theo}^c$<br>(kDa) | $M_n^b$<br>(kDa) | $\bar{D}^b$ | $M_{n,theo}/M_n$ | $\ln([\mathbf{M1}]_0/[\mathbf{M1}]_t)$ |
|-------|----------------------------------|--------------|--------------------------|-------------------------|------------------|-------------|------------------|----------------------------------------|
| S1    | 50                               | 15           | 40.0                     | 20                      | 22               | 1.06        | 0.909            | 0.510                                  |
| S2    | 50                               | 30           | 58.9                     | 30                      | 32               | 1.03        | 0.938            | 0.889                                  |
| S3    | 50                               | 60           | 84.1                     | 43                      | 46               | 1.03        | 0.929            | 1.84                                   |
| S4    | 50                               | 120          | 97.8                     | 50                      | 54               | 1.03        | 0.922            | 3.82                                   |
| S5    | 50                               | 240          | 100                      | 51                      | 55               | 1.02        | 0.927            | –                                      |
| S6    | 100                              | 15           | 32.0                     | 33                      | 38               | 1.05        | 0.868            | 0.386                                  |
| S7    | 100                              | 30           | 50.5                     | 52                      | 57               | 1.01        | 0.912            | 0.703                                  |
| S8    | 100                              | 60           | 76.0                     | 78                      | 86               | 1.01        | 0.907            | 1.43                                   |
| S9    | 100                              | 120          | 92.1                     | 94                      | 108              | 1.01        | 0.870            | 2.67                                   |
| S10   | 100                              | 240          | 99.1                     | 101                     | 115              | 1.01        | 0.878            | 4.71                                   |
| S11   | 100                              | 480          | 100                      | 102                     | 118              | 1.01        | 0.864            | –                                      |
| S12   | 250                              | 15           | 18.0                     | 46                      | 65               | 1.01        | 0.708            | 0.198                                  |
| S13   | 250                              | 30           | 38.1                     | 97                      | 125              | 1.01        | 0.776            | 0.480                                  |
| S14   | 250                              | 60           | 62.2                     | 159                     | 199              | 1.01        | 0.799            | 0.973                                  |
| S15   | 250                              | 120          | 85.1                     | 217                     | 280              | 1.01        | 0.775            | 1.90                                   |
| S16   | 250                              | 240          | 96.6                     | 247                     | 312              | 1.01        | 0.792            | 3.38                                   |
| S17   | 250                              | 480          | 100                      | 255                     | 324              | 1.01        | 0.787            | –                                      |
| S18   | 500                              | 15           | 13.8                     | 70                      | 106              | 1.02        | 0.660            | 0.182                                  |
| S19   | 500                              | 30           | 30.3                     | 155                     | 208              | 1.02        | 0.745            | 0.361                                  |
| S20   | 500                              | 60           | 51.6                     | 263                     | 343              | 1.02        | 0.767            | 0.726                                  |
| S21   | 500                              | 120          | 77.6                     | 396                     | 495              | 1.02        | 0.800            | 1.50                                   |
| S22   | 500                              | 240          | 93.7                     | 478                     | 605              | 1.03        | 0.790            | 2.76                                   |
| S23   | 500                              | 480          | 98.8                     | 504                     | 626              | 1.04        | 0.805            | 4.42                                   |
| S24   | 500                              | 960          | 100                      | 510                     | 634              | 1.04        | 0.804            | –                                      |
| S25   | 1000                             | 15           | 13.6                     | 139                     | 181              | 1.06        | 0.768            | 0.146                                  |
| S26   | 1000                             | 30           | 27.8                     | 284                     | 333              | 1.02        | 0.853            | 0.326                                  |
| S27   | 1000                             | 60           | 49.0                     | 500                     | 543              | 1.03        | 0.921            | 0.673                                  |
| S28   | 1000                             | 120          | 71.8                     | 733                     | 797              | 1.03        | 0.920            | 1.27                                   |
| S29   | 1000                             | 240          | 87.2                     | 890                     | 972              | 1.04        | 0.916            | 2.06                                   |
| S30   | 1000                             | 480          | 96.2                     | 982                     | 1078             | 1.05        | 0.913            | 3.27                                   |
| S31   | 1000                             | 960          | 100                      | 1020                    | 1138             | 1.06        | 0.896            | –                                      |

<sup>a</sup> $t$ : Polymerization time. <sup>b</sup>Determined by SEC-MALLS. <sup>c</sup> $M_{n,theo} = [\mathbf{M1}]_0/[\mathbf{I}]_0 \times \text{conv}/100\% \times \text{MW of } \mathbf{M1}$ .

**Table S3** ROMP of **M2** initiated by **Ru** (**I**) in THF at 25 °C ( $[\mathbf{M2}]_0 = 0.1$  M)

| Entry | $[\mathbf{M2}]_0/[\mathbf{I}]_0$ | $t^a$<br>(s) | Conv <sup>b</sup><br>(%) | $M_{n,theo}^c$<br>(kDa) | $M_n^b$<br>(kDa) | $\bar{D}^b$ | $M_{n,theo}/M_n$ | $\ln([\mathbf{M2}]_0/[\mathbf{M2}]_t)$ |
|-------|----------------------------------|--------------|--------------------------|-------------------------|------------------|-------------|------------------|----------------------------------------|
| S32   | 50                               | 120          | 23.3                     | 12                      | 16               | 1.07        | 0.750            | 0.265                                  |
| S33   | 50                               | 240          | 38.2                     | 20                      | 26               | 1.03        | 0.769            | 0.481                                  |
| S34   | 50                               | 480          | 59.2                     | 31                      | 40               | 1.03        | 0.775            | 0.896                                  |
| S35   | 50                               | 960          | 82.7                     | 44                      | 56               | 1.04        | 0.786            | 1.75                                   |
| S36   | 50                               | 1920         | 97.1                     | 52                      | 67               | 1.04        | 0.776            | 3.54                                   |
| S37   | 50                               | 3840         | 100                      | 53                      | 71               | 1.04        | 0.746            | –                                      |
| S38   | 100                              | 240          | 23.7                     | 25                      | 30               | 1.03        | 0.833            | 0.271                                  |
| S39   | 100                              | 480          | 39.4                     | 42                      | 49               | 1.02        | 0.857            | 0.501                                  |
| S40   | 100                              | 960          | 62.2                     | 66                      | 80               | 1.02        | 0.825            | 0.973                                  |
| S41   | 100                              | 1920         | 86.3                     | 92                      | 112              | 1.04        | 0.821            | 1.99                                   |
| S42   | 100                              | 3840         | 98.1                     | 104                     | 126              | 1.05        | 0.825            | 3.96                                   |
| S43   | 100                              | 7680         | 100                      | 106                     | 132              | 1.06        | 0.803            | –                                      |
| S44   | 250                              | 480          | 18.9                     | 50                      | 55               | 1.03        | 0.909            | 0.207                                  |
| S45   | 250                              | 960          | 32.5                     | 85                      | 96               | 1.02        | 0.885            | 0.387                                  |
| S46   | 250                              | 1920         | 54.5                     | 143                     | 166              | 1.03        | 0.861            | 0.772                                  |
| S47   | 250                              | 3840         | 84.1                     | 221                     | 262              | 1.05        | 0.844            | 1.78                                   |
| S48   | 250                              | 7680         | 96.9                     | 258                     | 312              | 1.10        | 0.827            | 3.47                                   |
| S49   | 500                              | 960          | 24.7                     | 131                     | 130              | 1.04        | 1.01             | 0.284                                  |
| S50   | 500                              | 1920         | 42.8                     | 228                     | 218              | 1.06        | 1.04             | 0.559                                  |
| S51   | 500                              | 3840         | 68.7                     | 365                     | 345              | 1.11        | 1.06             | 1.16                                   |
| S52   | 500                              | 7680         | 86.0                     | 457                     | 502              | 1.14        | 0.910            | 1.97                                   |
| S53   | 1000                             | 1920         | 24.9                     | 265                     | 270              | 1.04        | 0.981            | 0.286                                  |
| S54   | 1000                             | 3840         | 38.6                     | 410                     | 436              | 1.05        | 0.940            | 0.488                                  |
| S55   | 1000                             | 7680         | 62.6                     | 666                     | 736              | 1.13        | 0.904            | 0.984                                  |

<sup>a</sup>t: Polymerization time. <sup>b</sup>Determined by SEC-MALLS. <sup>c</sup> $M_{n,theo} = [\mathbf{M2}]_0/[\mathbf{I}]_0 \times \text{conv}/100\% \times \text{MW of } \mathbf{M2}$ .

**Table S4** ROMP of **M3** initiated by **Ru** (I) in THF at 25 °C ([**M3**]<sub>0</sub> = 0.1 M)

| Entry | [ <b>M3</b> ] <sub>0</sub> /[I] <sub>0</sub> | t <sup>a</sup><br>(s) | conv <sup>b</sup><br>(%) | M <sub>n,theo</sub> <sup>c</sup><br>(kDa) | M <sub>n</sub> <sup>b</sup><br>(kDa) | <i>Đ</i> <sup>b</sup> | M <sub>n,theo</sub> /M <sub>n</sub> | ln([ <b>M3</b> ] <sub>0</sub> /[ <b>M3</b> ] <sub>t</sub> ) |
|-------|----------------------------------------------|-----------------------|--------------------------|-------------------------------------------|--------------------------------------|-----------------------|-------------------------------------|-------------------------------------------------------------|
| S56   | 50                                           | 15                    | 45.5                     | 28                                        | 30                                   | 1.04                  | 0.933                               | 0.607                                                       |
| S57   | 50                                           | 30                    | 70.4                     | 43                                        | 47                                   | 1.04                  | 0.915                               | 1.22                                                        |
| S58   | 50                                           | 60                    | 91.4                     | 56                                        | 62                                   | 1.02                  | 0.903                               | 2.45                                                        |
| S59   | 50                                           | 120                   | 99.3                     | 60                                        | 68                                   | 1.02                  | 0.882                               | 4.96                                                        |
| S60   | 50                                           | 240                   | 100                      | 61                                        | 69                                   | 1.01                  | 0.844                               | –                                                           |
| S61   | 100                                          | 15                    | 42.6                     | 52                                        | 58                                   | 1.02                  | 0.897                               | 0.555                                                       |
| S62   | 100                                          | 30                    | 68.4                     | 83                                        | 90                                   | 1.01                  | 0.922                               | 1.15                                                        |
| S63   | 100                                          | 60                    | 89.3                     | 109                                       | 115                                  | 1.01                  | 0.948                               | 2.23                                                        |
| S64   | 100                                          | 120                   | 98.8                     | 120                                       | 127                                  | 1.01                  | 0.945                               | 4.42                                                        |
| S65   | 100                                          | 240                   | 100                      | 122                                       | 125                                  | 1.01                  | 0.976                               | –                                                           |
| S66   | 250                                          | 15                    | 34.9                     | 106                                       | 118                                  | 1.03                  | 0.898                               | 0.429                                                       |
| S67   | 250                                          | 30                    | 60.5                     | 184                                       | 192                                  | 1.02                  | 0.958                               | 0.929                                                       |
| S68   | 250                                          | 60                    | 86.2                     | 262                                       | 259                                  | 1.02                  | 1.01                                | 1.98                                                        |
| S69   | 250                                          | 120                   | 97.9                     | 298                                       | 295                                  | 1.04                  | 1.01                                | 3.77                                                        |
| S70   | 250                                          | 240                   | 100                      | 305                                       | 302                                  | 1.05                  | 1.01                                | –                                                           |
| S71   | 500                                          | 15                    | 29.5                     | 180                                       | 202                                  | 1.01                  | 0.892                               | 0.349                                                       |
| S72   | 500                                          | 30                    | 54.1                     | 329                                       | 337                                  | 1.03                  | 0.876                               | 0.779                                                       |
| S73   | 500                                          | 60                    | 78.6                     | 479                                       | 459                                  | 1.04                  | 1.04                                | 1.54                                                        |
| S74   | 500                                          | 120                   | 95.3                     | 580                                       | 544                                  | 1.06                  | 1.07                                | 3.06                                                        |
| S75   | 500                                          | 240                   | 100                      | 609                                       | 570                                  | 1.08                  | 1.06                                | –                                                           |
| S76   | 1000                                         | 15                    | 20.9                     | 255                                       | 289                                  | 1.03                  | 0.882                               | 0.234                                                       |
| S77   | 1000                                         | 30                    | 41.9                     | 510                                       | 517                                  | 1.05                  | 0.986                               | 0.543                                                       |
| S78   | 1000                                         | 60                    | 67.9                     | 827                                       | 739                                  | 1.08                  | 1.25                                | 1.14                                                        |
| S79   | 1000                                         | 120                   | 89.5                     | 1090                                      | 854                                  | 1.13                  | 1.27                                | 2.41                                                        |
| S80   | 1000                                         | 240                   | 98.9                     | 1205                                      | 902                                  | 1.14                  | 1.34                                | 4.51                                                        |
| S81   | 1000                                         | 480                   | 100                      | 1218                                      | 910                                  | 1.15                  | 1.34                                | –                                                           |

<sup>a</sup>t: Polymerization time. <sup>b</sup>Determined by SEC-MALLS. <sup>c</sup>M<sub>n,theo</sub> = [**M3**]<sub>0</sub>/[I]<sub>0</sub> × conv/100% × MW of **M3**.

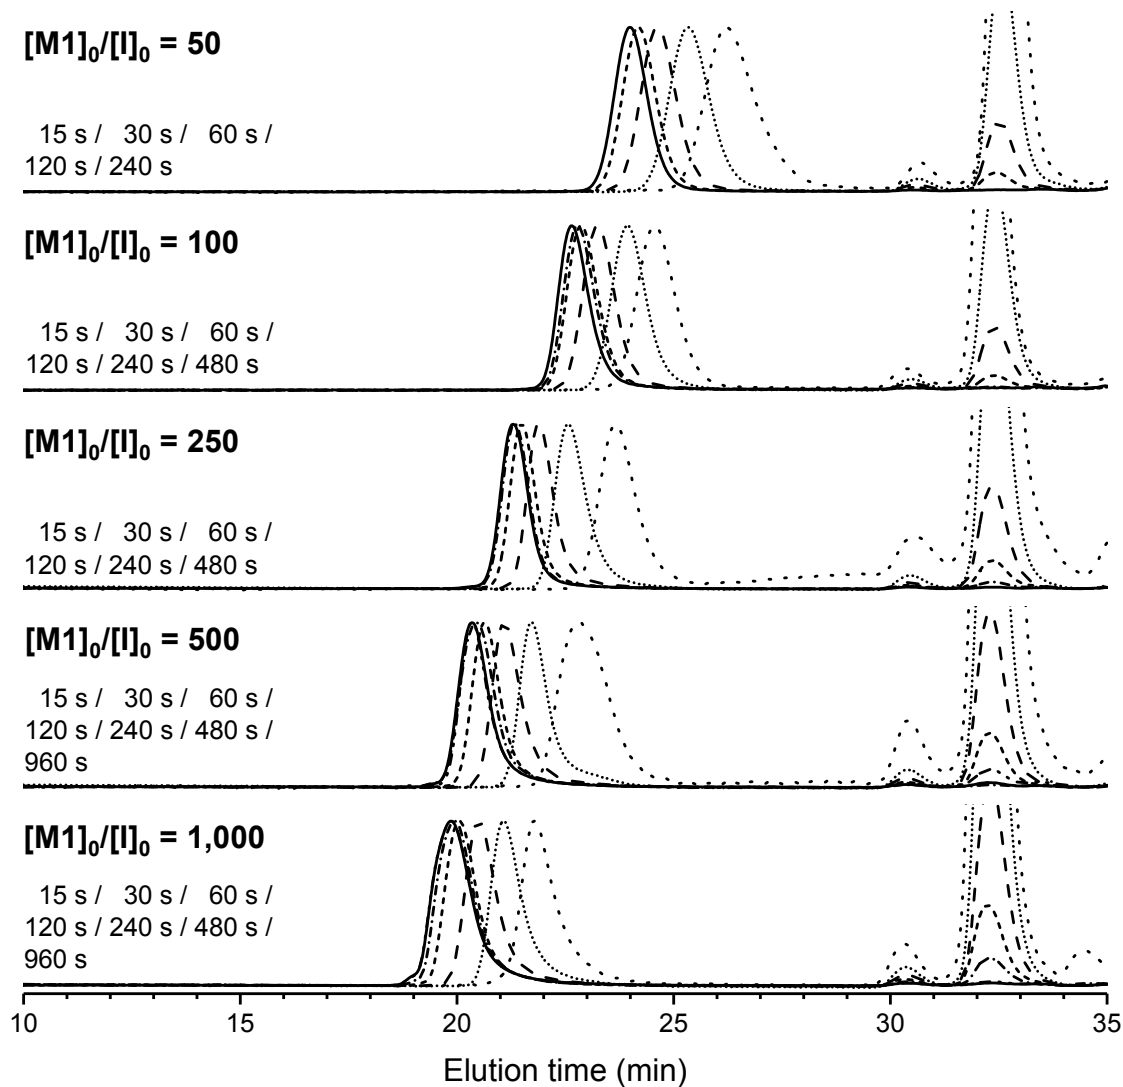

**Fig. S10** SEC-dRI traces of **P1** aliquots (entry S11–31) extracted from the homopolymerization mixtures ( $[M1]_0 = 0.1$  M) at different time intervals.

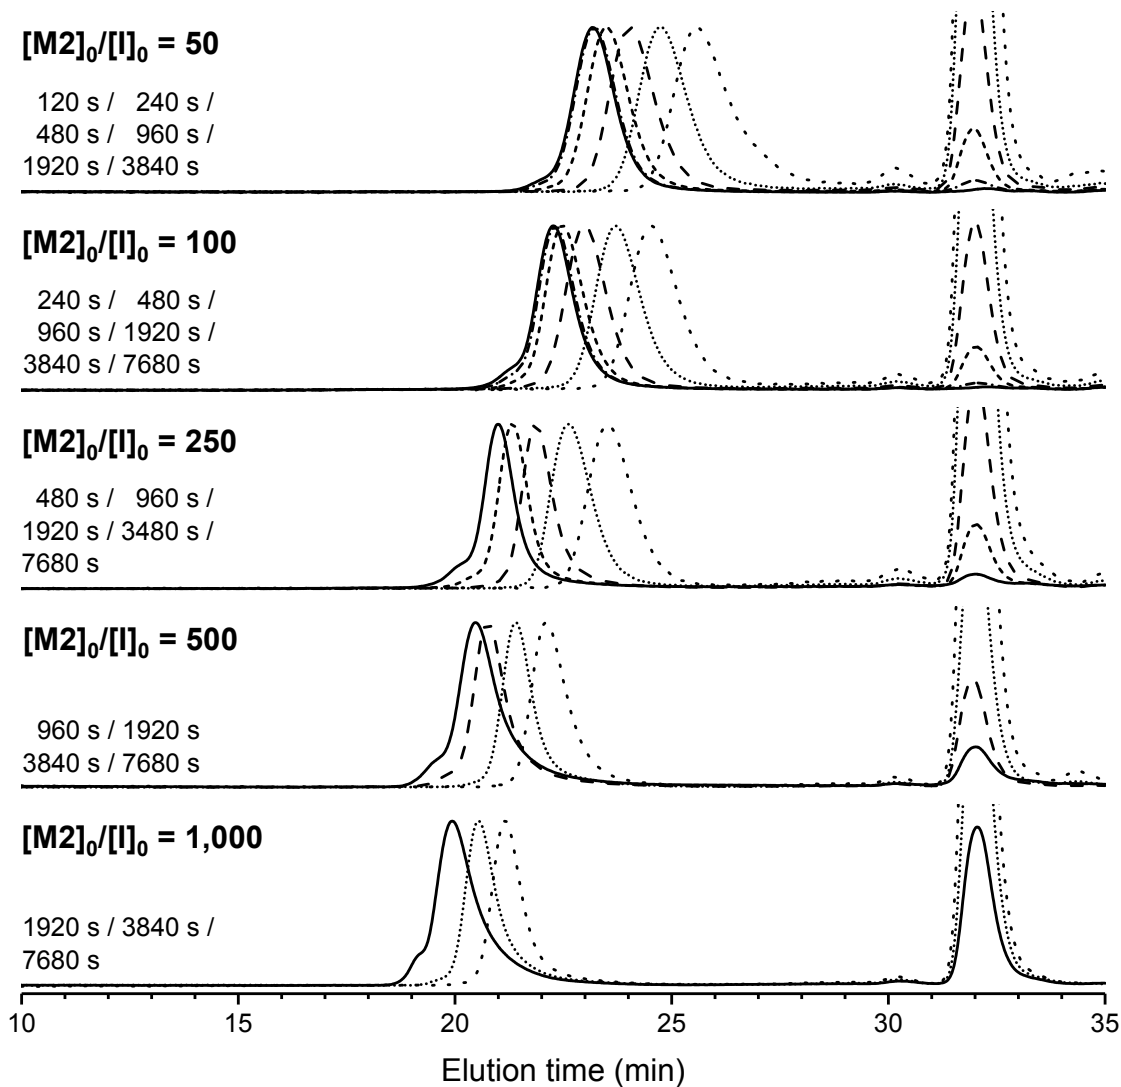

**Fig. S11** SEC-dRI traces of **P2** aliquots (entry S32–55) extracted from the homopolymerization mixtures ( $[M2]_0 = 0.1$  M) at different time intervals.

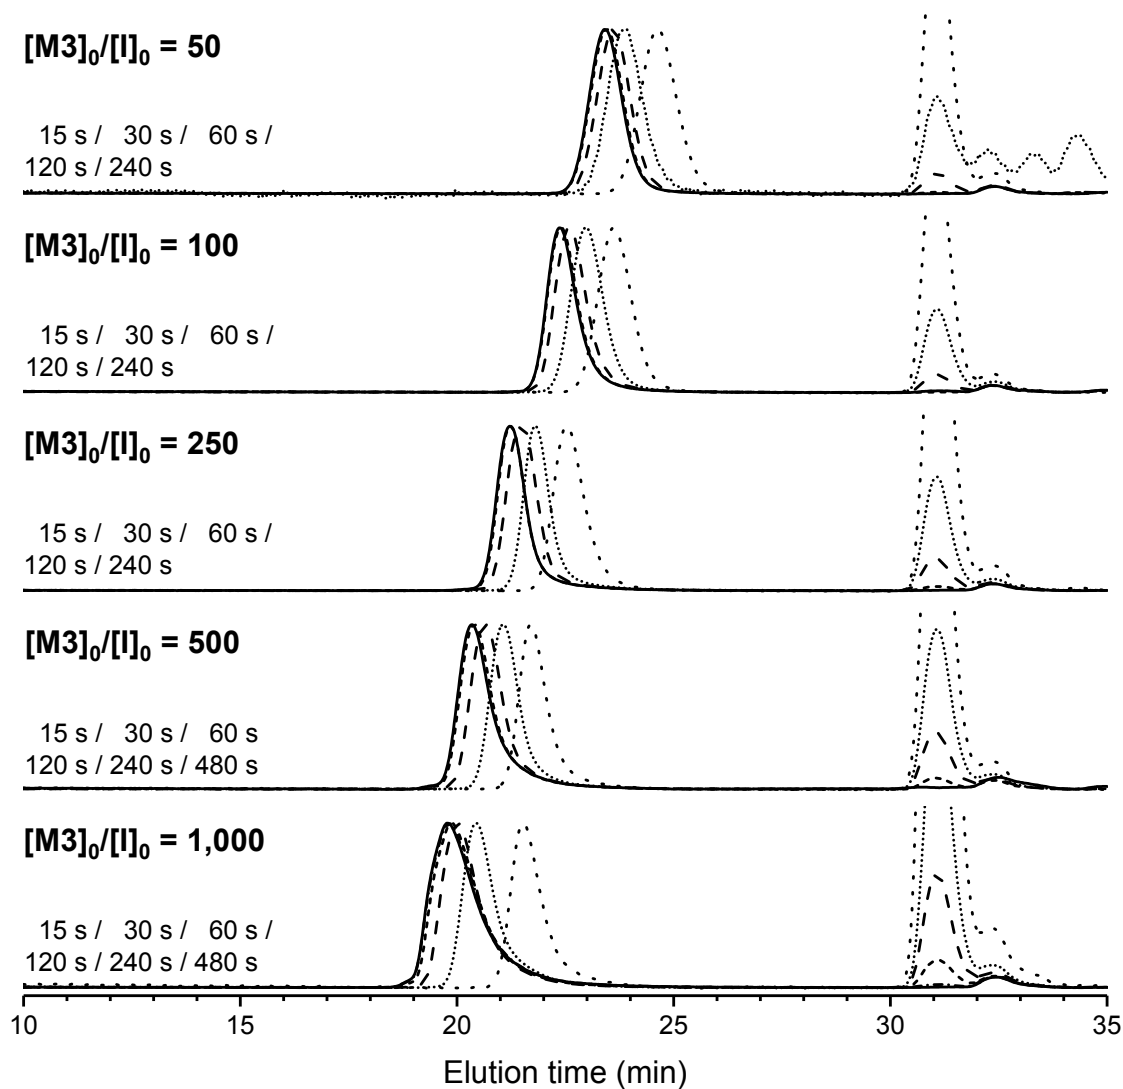

**Fig. S12** SEC-dRI traces of **P3** aliquots (entry S56–81) extracted from the homopolymerization mixtures ( $[M3]_0 = 0.1$  M) at different time intervals.

## S4. Physical properties of P1–3s

**Table S5**  $R_{g,z}$  values for **P1–3s** in 3.5 mg/mL THF solutions

| Entry     | $M_w^a$ |                 | $R_{g,z}^a$        |      |                     |
|-----------|---------|-----------------|--------------------|------|---------------------|
|           | (kDa)   | DP <sub>w</sub> | logDP <sub>w</sub> | (nm) | log( $R_{g,z}$ /nm) |
| <b>P1</b> |         |                 |                    |      |                     |
| 17        | 109     | 107             | 2.03               | 13.2 | 1.12                |
| 18        | 278     | 272             | 2.43               | 21.7 | 1.34                |
| 19        | 545     | 534             | 2.73               | 29.4 | 1.47                |
| 20        | 1145    | 1122            | 3.05               | 38.2 | 1.58                |
| <b>P2</b> |         |                 |                    |      |                     |
| 7         | 140     | 132             | 2.12               | 14.1 | 1.15                |
| 8         | 342     | 321             | 2.51               | 21.9 | 1.34                |
| 9         | 572     | 538             | 2.73               | 27.6 | 1.44                |
| 10        | 834     | 784             | 2.89               | 34.2 | 1.53                |
| <b>P3</b> |         |                 |                    |      |                     |
| 27        | 126     | 103             | 2.01               | 9.7  | 0.987               |
| 28        | 335     | 275             | 2.44               | 16.4 | 1.21                |
| 29        | 701     | 576             | 2.76               | 28.2 | 1.45                |
| 30        | 1481    | 1216            | 3.08               | 52.7 | 1.72                |

<sup>a</sup>Determined from SEC-MALLS.

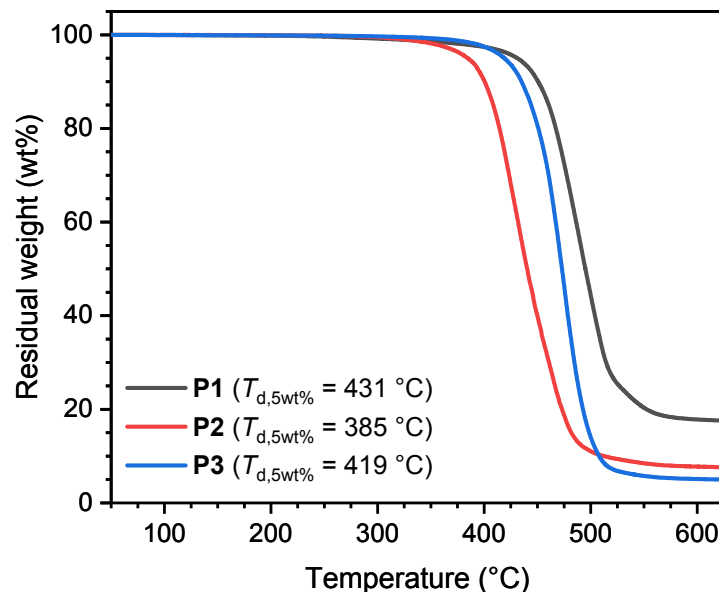

**Fig. S13** TGA thermograms of **P1** ( $M_n = 1042$  kDa;  $\bar{D} = 1.10$ ), **P2** ( $M_n = 736$  kDa;  $\bar{D} = 1.13$ ) and **P3** ( $M_n = 1236$  kDa;  $\bar{D} = 1.20$ ) recorded at a heating rate of  $10$  °C/min under a nitrogen atmosphere. Temperatures for 5 wt% loss were indicated as  $T_{d,5wt\%}$ .

### Results and discussion on TGA analysis.

The thermal degradation behaviors of **P1** ( $M_n = 1042$  kDa;  $\bar{D} = 1.10$ ), **P2** ( $M_n = 736$  kDa;  $\bar{D} = 1.13$ ) and **P3** ( $M_n = 1236$  kDa;  $\bar{D} = 1.20$ ) were examined by TGA at a heating rate of  $10$  °C/min under a nitrogen atmosphere (Fig. S12). According to a previous study on the thermal degradation of POSS, the weight loss of octaalkyl-substituted POSSs occurs by evaporation at temperatures above their melting points. In particular, the weight loss of octaisobutyl POSS generally begins at approximately  $200$  °C.<sup>S2</sup> However, POSS molecules bound to the polymer chain must be evaporated after Si–C bond cleavage. In the TGA thermograms of **P1–3**, the degradation temperatures at the initial 5 wt% loss ( $T_{d,5wt\%}$ ) were observed to be  $431$  °C for **P1**,  $385$  °C for **P2**, and  $419$  °C for **P3**, which correspond the temperatures for Si–C bond cleavage. The lowest thermal stability of **P2** indicated the catalytic effect of the secondary amine on the

Si–C bond cleavage. The thermal stability of **P3**, which has fewer catalytic amide groups, is between the stabilities of **P1** and **P2**. The residual weights (16% for **P1**, 6% for **P2**, and 4% for **P3**) even after heating to 800 °C resulted from the conversion of POSS residues to amorphous silica.<sup>S2</sup>

## S5. Additional TEM micrographs of P3-*b*-P(NB-*g*-BzMA)

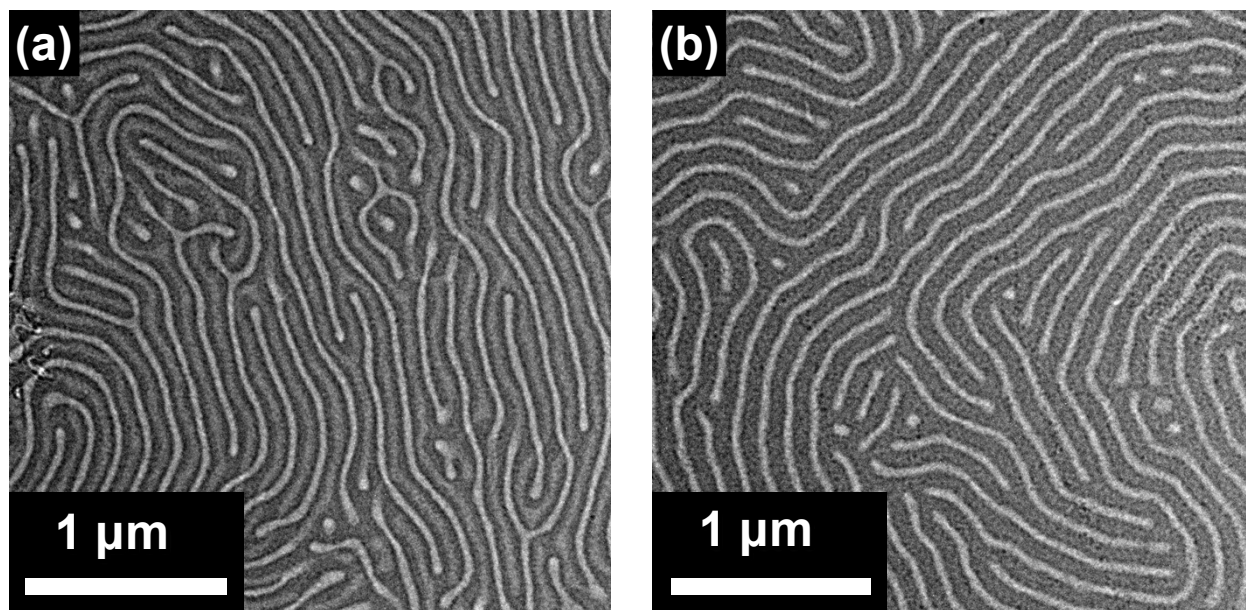

**Fig. S14** (a) TEM micrographs of thin films of self-assembled **P3-*b*-P(NB-*g*-BzMA)** with  $f_A = 67$  wt% ( $M_n = 890$  kDa;  $\bar{D} = 1.07$ ) displaying (a) a bilayer and (b) a monolayer of **P(NB-*g*-BzMA)** cylinders.

## S6. References

- S1 C.-G. Chae, Y.-G. Yu, H.-B. Seo, M.-J. Kim, R. H. Grubbs and J.-S. Lee, *Macromolecules*, 2018, **51**, 3458–3466.
- S2 A. Fina, D. Tabuani, F. Carniato, A. Frache, E. Boccaleri and G. Camino, *Thermochim. Acta*, 2006, **440**, 36–42.
